# Supplementary material
Source: PubMed Central journal article supplement (PMC5505788)
Supplement: NIHMS876340-supplement-1.pdf [file NIHMS876340-supplement-1.pdf]

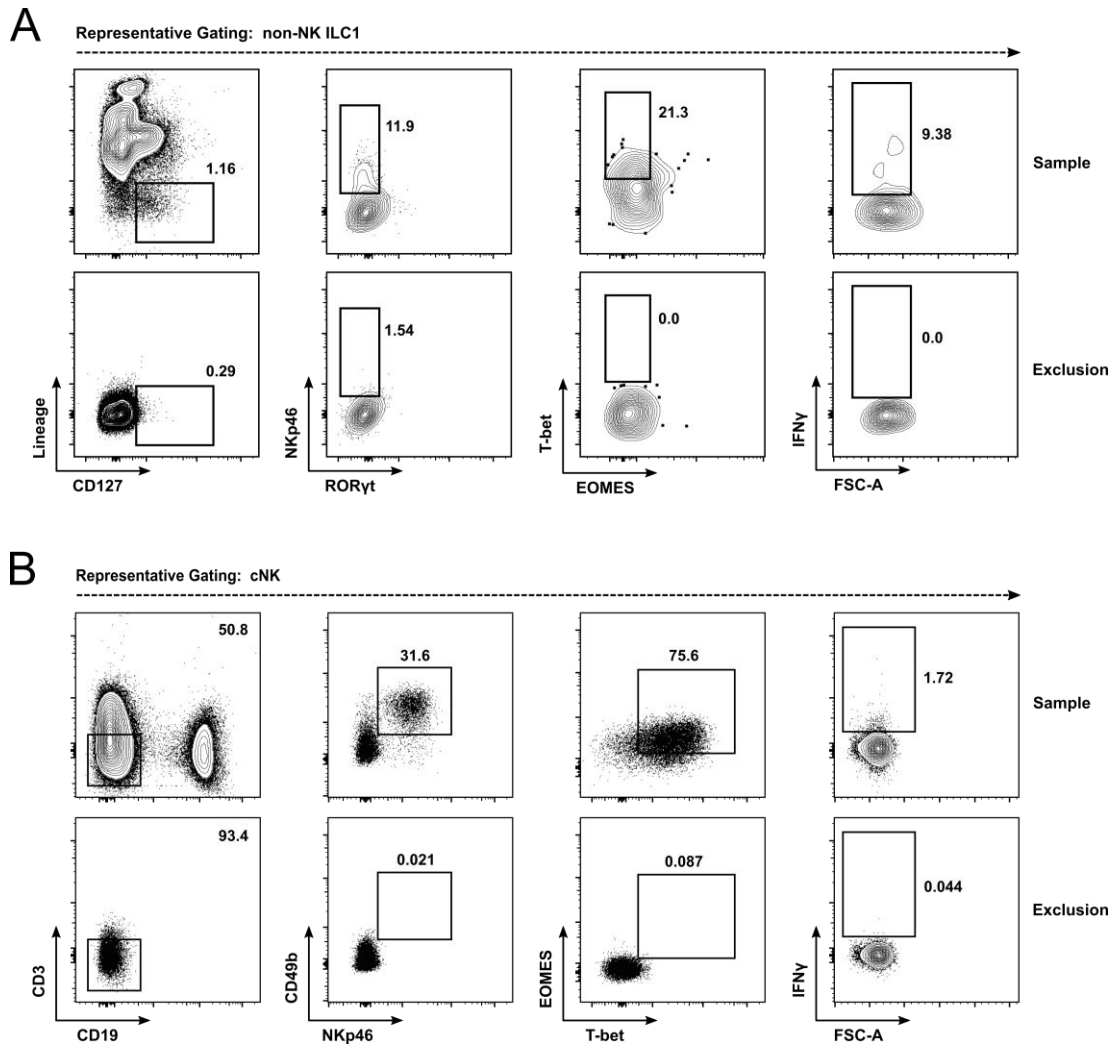

**Supplemental Figure 1: Gating strategies for cNK and ILC1.** Data are representative of the gating strategies used throughout the paper to measure cNK and non-NK ILC1. Samples shown were pre-gated for viable singlets with low to intermediate FSC-A and SSC-A properties consistent with resting and activated lymphocytes.

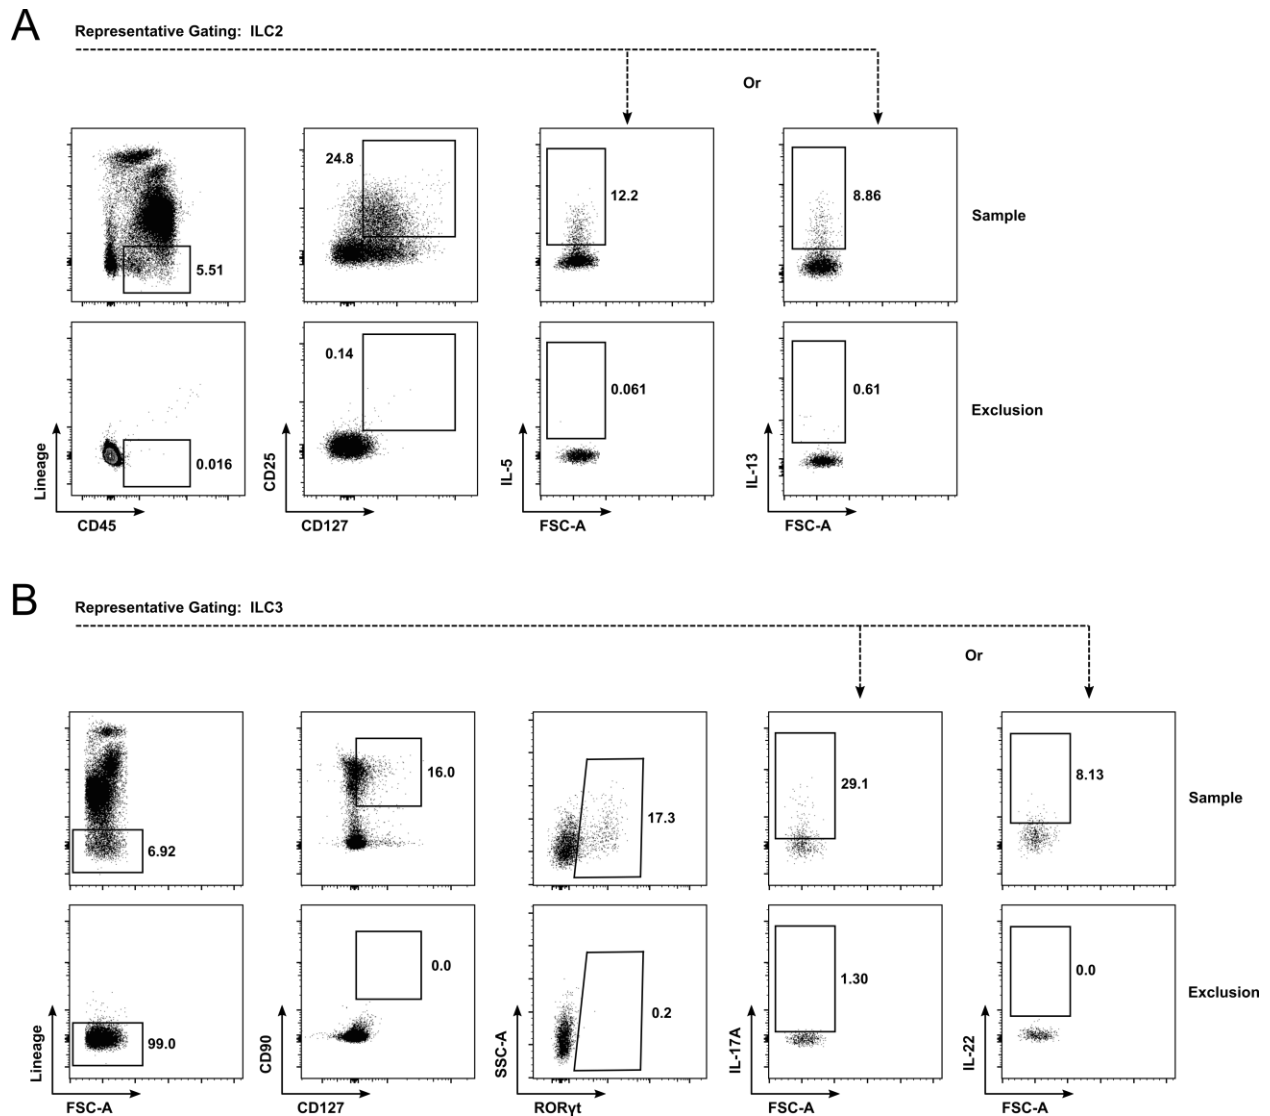

**Supplemental Figure 2: Gating strategies for ILC2 and ILC3.** Data are representative of the gating strategies used throughout the paper to measure ILC2 and ILC3. Samples shown were pre-gated for viable singlets with low to intermediate FSC-A and SSC-A properties consistent with resting and activated lymphocytes.

**Supplemental Table I: Antibodies for flow cytometry**

| <b>Epitope</b>                         | <b>Clone</b> | <b>Manufacturer</b> | <b>Fluorophore</b> | <b>Dilution<sup>a</sup></b> |
|----------------------------------------|--------------|---------------------|--------------------|-----------------------------|
| <i>CD3e</i>                            | 145-2C11     | BD                  | APC-Cy7            | 1:100                       |
| <i>CD19</i>                            | 6D5          | BioLegend           | PE-Cy5             | 1:800                       |
| <i>CD49b</i>                           | DX5          | eBioscience         | APC                | 1:200                       |
| <i>NKp46</i>                           | 29A1.4       | eBioscience         | PerCP-eFluor 710   | 1:200                       |
| <i>EOMES</i>                           | DAN11MAG     | eBioscience         | AF488              | 1:100                       |
| <i>T-bet</i>                           | eBio4B10     | eBioscience         | PE-Cy7             | 1:200                       |
| <i>IFN<math>\gamma</math></i>          | XMG1.2       | eBioscience         | eFluor 450         | 1:200                       |
| <i>Lineage Cocktail</i>                | 130-092-613  | Miltenyi            | Biotin             | 1:25                        |
| <i>CD3</i>                             | 17A2         | eBioscience         | Biotin             | 1:200                       |
| <i>CD45</i>                            | 30-F11       | Tonbo               | rF710              | 1:400                       |
| <i>CD25</i>                            | PC61.5       | eBioscience         | AF488              | 1:50                        |
| <i>CD127<sup>b</sup></i>               | SB/199       | eBioscience         | PE-Cy7             | 1:200                       |
| <i>CD127<sup>c</sup></i>               | SB/199       | BioLegend           | APC                | 1:100                       |
| <i>CD127<sup>d</sup></i>               | A7R34        | eBioscience         | PE-Cy5             | 1:200                       |
| <i>IL-5</i>                            | TRFK5        | BD Biosciences      | APC                | 1:200                       |
| <i>IL-13</i>                           | eBio13A      | eBioscience         | PE                 | 1:200                       |
| <i>CD90.2</i>                          | 30-H12       | eBioscience         | FITC               | 1:400                       |
| <i>ROR<math>\gamma</math>t</i>         | B2D          | eBioscience         | PE                 | 1:200                       |
| <i>ROR<math>\gamma</math>t</i>         | Q31-378      | BD Biosciences      | BV786              | 1:50                        |
| <i>IL-17A</i>                          | eBio17B7     | eBioscience         | PE-Cy7             | 1:200                       |
| <i>IL-22</i>                           | 1H8PWSR      | eBioscience         | PerCP-eFluor 710   | 1:200                       |
| <i>Ki67</i>                            | SolA15       | eBioscience         | eFluor 450         | 1:100                       |
| <i>IFN<math>\alpha</math>R1</i>        | MAR1-5A3     | eBioscience         | PE                 | 1:100                       |
| <i>IFN<math>\gamma</math>R1(CD119)</i> | 200          | eBioscience         | PE                 | 1:100                       |
| <i>IL-27R<math>\alpha</math></i>       | 2918         | BD Biosciences      | PE                 | 1:100                       |
| <i>Stat1 (pY701)</i>                   | 4a           | BD Biosciences      | PE                 | 1:5                         |
| <i>CD45.1</i>                          | A20          | BioLegend           | BV510              | 1:100                       |
| <i>CD45.2</i>                          | 104          | BioLegend           | BV421              | 1:100                       |
| <i>Streptavidin</i>                    | 405208       | BioLegend           | APC-Cy7            | 1:400                       |

<sup>a</sup> Stains were performed in a volume of 100  $\mu$ l with 3-5 million total lung cells

<sup>b</sup> Used in flow cytometric analysis of ILC2

<sup>c</sup> Used in flow cytometric analysis of ILC3

<sup>d</sup> Used in flow cytometric analysis of ILC1
